# Supplementary material
Source: publisher site journal article supplement (https://www.dovepress.com/get_supplementary_file.php?f=363654.docx)
Supplement: Supplementary file 1 [file get_supplementary_file.php]

| **Appendix 1.** Algorithm for assessing physical and mental multimorbidity. | | | | | | | |
| --- | --- | --- | --- | --- | --- | --- | --- |
| **Trajectory category** | **Disease group** | **Origina** | **Coding definitionb** | **Diagnosis codes (ICD-10)** | **Diagnosis time frame** | **Drug codes (ATC)** | **Prescription time frame** |
| **Circulatory system** | Hypertension | a, b | Diagnosis AND/OR prescriptions of antihypertensives, if not ischemic heart disease or heart failure (or kidney disease: only diuretics) | I10-I13, I15 | Ever | C02, C04, C07, C08, C09, C03 | Twice last year |
|  | Dyslipidemia | b | Diagnosis AND/OR drug prescription for lipid-lowering drugs if not ischemic heart disease. | E78 | Last two years | C10 | Twice last year |
|  | Ischemic heart disease | a, b | Diagnosis AND/OR prescription for antianginal drug | I20-I25 | Ever | C01DA | Twice last year |
|  | Atrial fibrillation | a, b | Diagnosis | I48 | Ever |  |  |
|  | Heart failure | a, b | Diagnosis | I50 | Ever |  |  |
|  | Peripheral artery occlusive disease | a, b | Diagnosis | I70-I74 | Ever |  |  |
|  | Stroke | a, b | Diagnosis | I60-I64, I69 | Ever |  |  |
| **Endocrine system** | Diabetes mellitus | a, b | Diagnosis AND/OR prescription of antidiabetics | E10-E14 | Ever | A10A, A10B | Twice last year |
|  | Thyroid disorder | a, b | Diagnosis AND/OR prescription of thyroid therapy drugs | E00-E05, E061-E069, E07 | Last two years | H03 | Twice last year |
|  | Gout | b | Diagnosis | E79, M10 | Ever |  |  |
| **Pulmonary system and allergy** | Chronic pulmonary disease | a, b | Diagnosis AND/OR prescription for obstructive airway disease drugs | J40-J44, J47, J96 | Ever | R03 | Twice last year |
|  | Allergy | b | Diagnosis AND/OR prescription for non-sedative antihistamines AND/OR nasal antiallergics | J45-J46 | Ever | R06AX, R06AE07, R06AE09, R01AC, R01AD | Twice last year |
| **Gastrointestinal system** | Ulcer/chronic gastritis | a, b | Diagnosis | K221, K25-K28, K293-K295 | Ever |  |  |
|  | Chronic liver disease | a, b | Diagnosis | B16-B19, K70-K74, K766, I85 | Ever |  |  |
|  | Inflammatory bowel disease | a, b | Diagnosis | K50-K51 | Ever |  |  |
|  | Diverticular disease of intestine | a, b | Diagnosis | K57 | Ever |  |  |
| **Urogenital system** | Chronic kidney disease | a, b | Diagnosis | N03, N11, N18-N19 | Ever |  |  |
|  | Prostate disorders | a, b | Diagnosis AND/OR prescription of prostate hyperplasia therapy drugs | N40 | Ever | C02CA, G04C | Twice last year |
| **Musculoskeletal system** | Connective tissue disorders | a, b | Diagnosis | M05-M06, M08-M09, M30-M36, D86 | Ever |  |  |
|  | Osteoporosis | b | Diagnosis AND/OR prescription for osteoporosis drugs | M80-M82 | Ever | M05B, G03XC01, H05AA | Twice last year |
|  | Painful condition | a, b | Repeated prescriptions of analgesics |  |  | N02A,  N02BA51, N02BE, M01A, M02A | Four times last year |
| **Hematological system** | HIV/AIDS | b | Diagnosis | B20-B24 | Ever |  |  |
|  | Anemias | b | Diagnosis | D50-D53, D55-D59, D60-D61, D63-D64 | Last two years |  |  |
| **Cancers** | Cancer | a, b | Diagnosis | C00-C43, C45- C97 | Last five years |  |  |
| **Neurological system** | Vision problem | a, b | Diagnosis | H40, H25, H54 | Ever |  |  |
|  | Hearing problem | a, b | Diagnosis | H90-H91, H931 | Ever |  |  |
|  | Migraine | a, b | Diagnosis AND/OR prescription of specific anti-migraine drugs | G43 | Last two years | N02C | Twice last year |
|  | Epilepsy | a, b | Diagnosis AND prescription of anti-epileptics | G40-G47 | Ever | N03 | Twice last year |
|  | Parkinson's disease |  | Diagnosis | G20-G22 | Ever |  |  |
|  | Multiple sclerosis | a | Diagnosis | G35 | Ever |  |  |
|  | Neuropathies | b | Diagnosis | G50-G64 | Last two years |  |  |
| **Mental health conditions** | Mood, stress-related, or anxiety disorders | a, b | Diagnosis | F32-F34, F40-F48 | Last two years |  |  |
|  | Psychological distress | a, b | Prescription of antidepressants if not other mental disorder |  |  | N06A | Twice last year |
|  | Alcohol problems | a, b | Diagnosis | F101-F109 | Last two years |  |  |
|  | Substance abuse | a, b | Diagnosis | F11-F16, F18-F19 | Last two years |  |  |
|  | Anorexia/bulimia | A | Diagnosis | F50 | Last two years |  |  |
|  | Bipolar affective disorder | a, b | Diagnosis AND/OR prescription of lithium salts | F30-F31 | Ever | N05AN | Twice last year |
|  | Schizophrenia or schizoaffective disorder | a, b | Diagnosis | F20, F25 | Ever |  |  |
|  | Dementia | a, b | Diagnosis AND/OR prescription of anti-dementia drugs | F00-F03, F051, G30 | Ever | N06D | Twice last year |
| **Abbreviations**: ICD-10, International Classification of Diseases, version 10; ATC, Anatomical Therapeutic Chemical classification system; HIV, human immunodeficiency virus; AIDS, acquired immunodeficiency syndrome.  **a** ICD-10 diagnosis code recorded or redeemed prescription of ATC-coded drug registered within defined time frames (time range: 1995-2019) in national health registers (the Danish National Patient Register, the Danish Diabetes Register, the Danish Cancer Register, the Danish Psychiatric Central Register, and the Danish National Prescription Registry). **b** a: Ref: Barnett et al.,1 b: Other index (Van den Bussche H. et al.,2 Huber CA et al.,3 Charlson ME et al.,4 and/or Elixhauser A. et al.5) | | | | | | | |

**References**

1) Barnett K, Mercer SW, Norbury M, et al. Epidemiology of Multimorbidity and implications for health care, research, and medical education: A cross-sectional study. *Lancet.* 2012;380:37-43.

2) Van den Bussche H, Schon G, Kolonko T, et al. Patterns of ambulatory medical care utilization in elderly patients with special reference to chronic diseases and multimorbidity—results from a claims data based observational study in Germany. *BMC Geriatr.* 2011;11:54.

3) Huber CA, Szucs TD, Rapold R, et al. Identifying patients with chronic conditions using pharmacy data in Switzerland: An updated mapping approach to the classification of medicines. *BMC Public Health.* 2013;13:1030-2458-13-1030.

4) Charlson ME, Pompei P, Ales KL, et al. A new method of classifying prognostic comorbidity in longitudinal studies: Development and validation. *J Chronic Dis.* 1987;40:373-383.

5) Elixhauser A, Steiner C, Harris DR, et al. Comorbidity measures for use with administrative data. *Med Care*. 1998;36:8-27.
